# Supplementary material for: Silicon-nanoparticles isolated by in situ grown polycrystalline graphene hollow spheres for enhanced lithium-ion storage
Source: Royal Society of Chemistry journal article supplement (doi:10.1039/c5ta00457h), 2015-01-01
Supplement: c5ta00457h1.pdf [file c5ta00457h1.pdf]

## Supporting Information

### **Silicon-Nanoparticles Isolated by *In-Situ* Grown Polycrystalline Graphene Hollow Spheres for Enhanced Lithium-Ion Storage**

**Juan Zhang,<sup>1‡</sup> Li Zhang,<sup>1‡\*</sup> Peng Xue,<sup>1‡</sup> Liya Zhang,<sup>1</sup> Xianlin Zhang,<sup>2</sup> Weiwei Hao,<sup>1</sup> Jinghua Tian,<sup>1</sup> Ming Shen<sup>2</sup> and Honghe Zheng<sup>1\*</sup>**

<sup>1</sup>*College of Physics, Optoelectronics and Energy & Collaborative Innovation Center of Suzhou*

*Nano Science and Technology, Soochow University, Suzhou, Jiangsu, 215006, P. R. China.*

<sup>2</sup>*Jiangsu Huasheng Corporation, Zhangjiagang, Jiangsu, 215600, P. R. China.*

*E-mail: zhangli81@suda.edu.cn, hhzheng@suda.edu.cn*

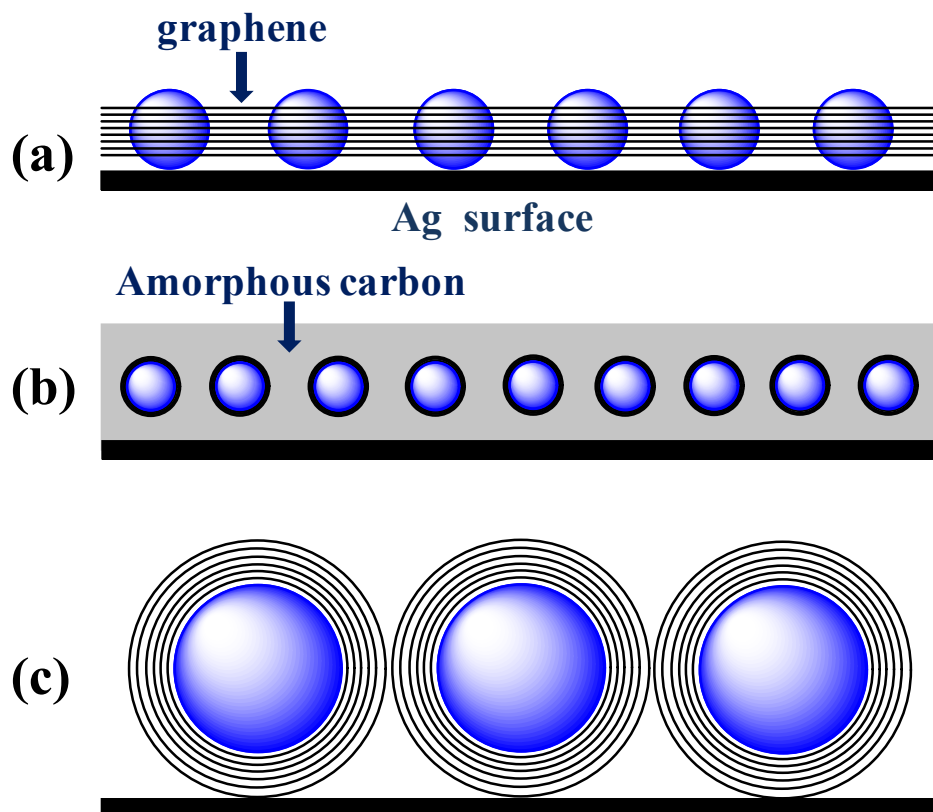

**Figure S1.** Schematic illustration of the influence of the amount of the catalyst precursor on the structure and degree of graphitization of the carbon shell: (a) At an appropriate  $\text{FeSO}_4$  concentration, the discrete graphene nanoislands produced around each Fe nanoisland will interconnect to form a compact and uniform polycrystalline graphene shell throughout the Ag surface, (b) At a low  $\text{FeSO}_4$  concentration, an amorphous carbon-rich shell is obtained due to the excessive carbon source, (c) At a high  $\text{FeSO}_4$  concentration, the size of the *in-situ* formed Fe nanoparticles is too large to catalyze the growth of an integrated polycrystalline graphene shell. The obtained coating layer is in fact composed of a series of closely packed graphene encapsulated Fe nanoparticles. The blue spheres represent the Fe nanoislands (or nanoparticles).

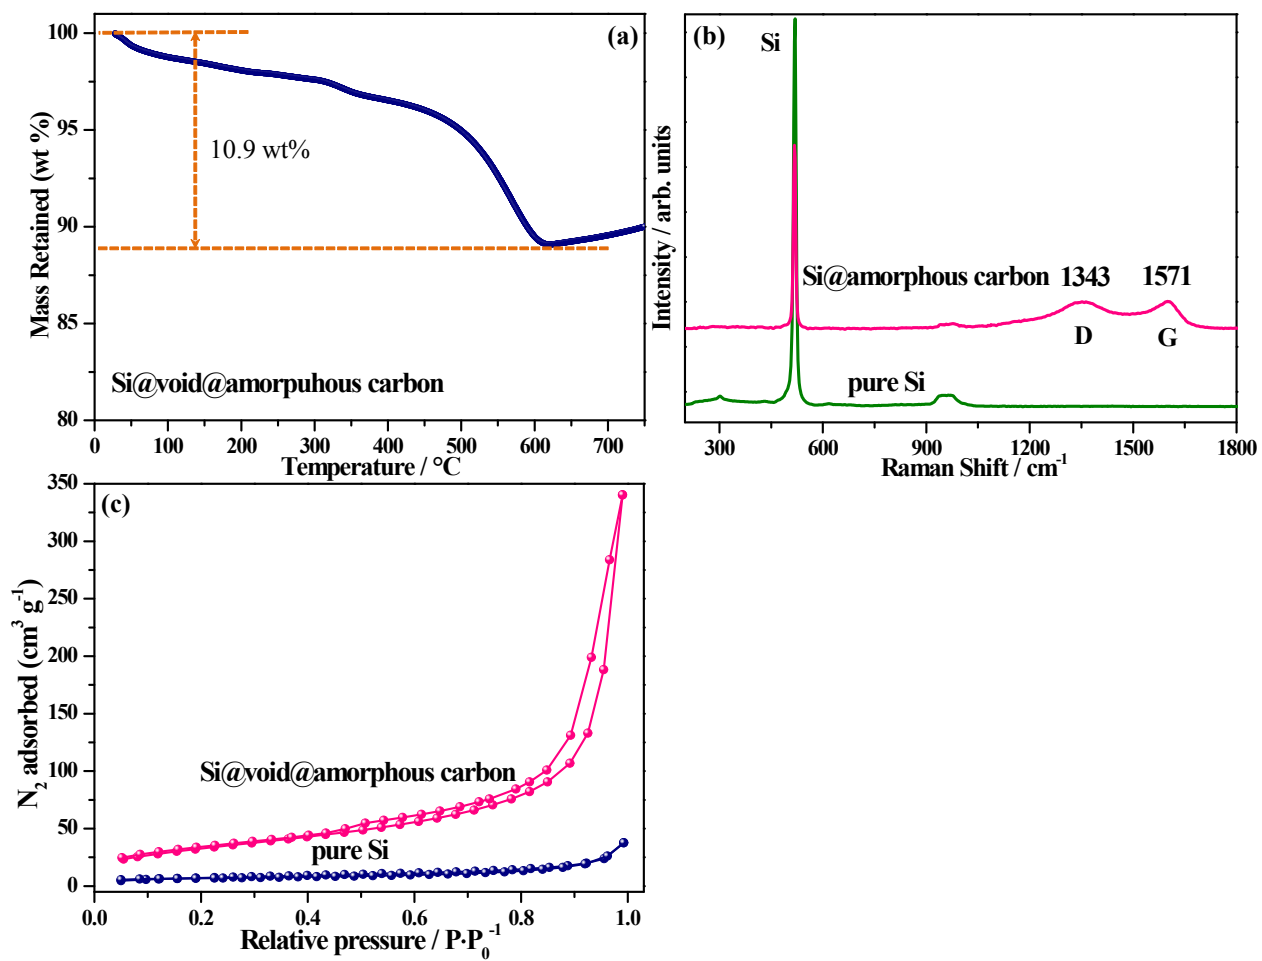

**Figure S2.** (a) TGA thermogram of the Si@void@amorphous carbon nanocomposites, (b) Raman spectra of the SiNPs and Si@void@amorphous carbon nanocomposites and (c) N<sub>2</sub> sorption isotherms of the pure SiNPs and Si@void@amorphous carbon nanocomposites.

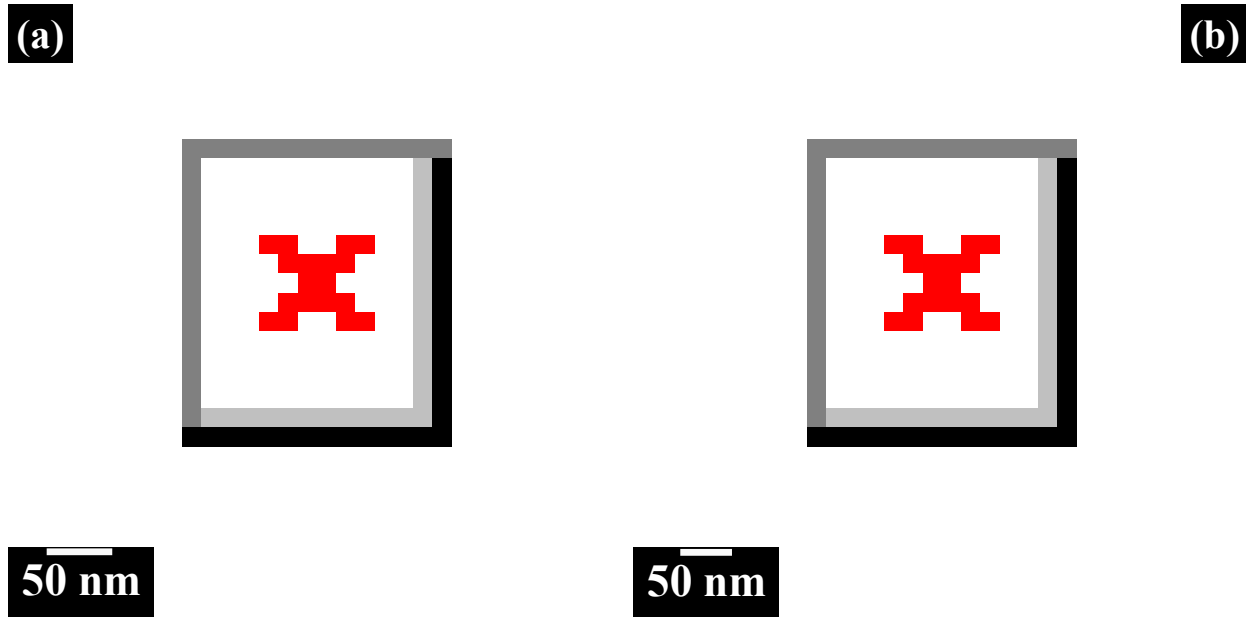

**Figure S3.** TEM images of (a) Si@void@graphene and (b) Si@void@amorphous carbon electrodes after the initial ten cycles in their fully discharged (lithiated) state.

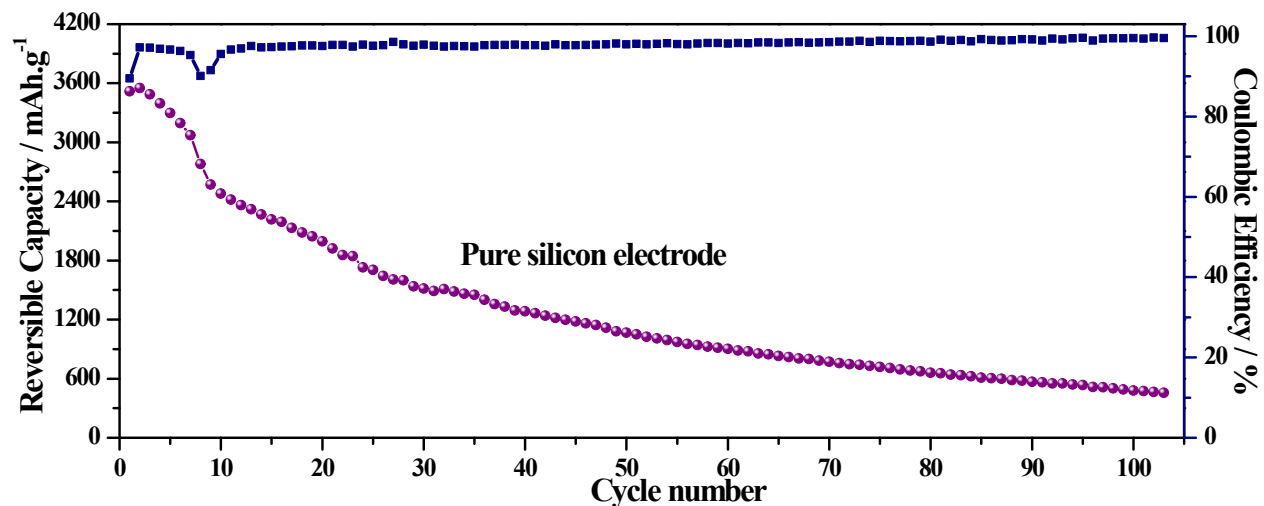

**Figure S4.** Reversible charge (delithiation) capacity and Coulombic efficiency versus cycle number profiles of the pure SiNPs electrodes.

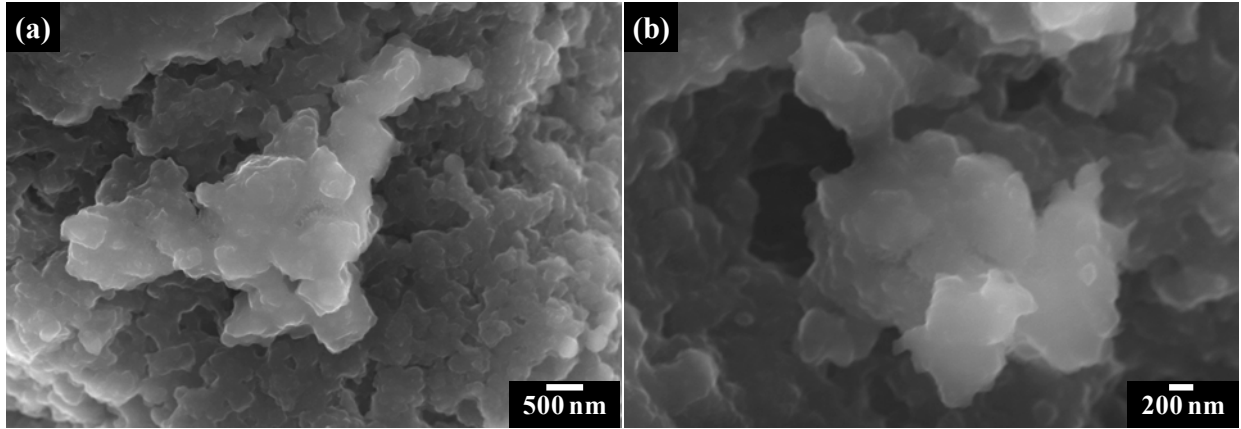

**Figure S5.** SEM images of the Si@void@amorphous carbon electrode after 600 cycles.
